# Supplementary material for: Variable self-assembly and in situ host–guest reaction of beta-cyclodextrin-modified graphene oxide composite Langmuir films with azobenzene compounds
Source: Royal Society of Chemistry journal article supplement (doi:10.1039/c7ra07109d), 2017-01-01
Supplement: c7ra07109d1.pdf [file c7ra07109d1.pdf]

## Supporting Information

### **Variable self-assembly and in situ host-guest reaction of beta-cyclodextrin-modified graphene oxide composite Langmuir films with azobenzene compounds**

Yagui Gao,<sup>a,b</sup> Tifeng Jiao,<sup>\*a,b</sup> Kai Ma,<sup>b</sup> Ruirui Xing,<sup>b,c</sup> Lexin Zhang,<sup>b</sup> Jingxin Zhou,<sup>\*b</sup> and Qiuming Peng<sup>a</sup>

<sup>a</sup> State Key Laboratory of Metastable Materials Science and Technology, Yanshan University, Qinhuangdao 066004, P. R. China

<sup>b</sup> Hebei Key Laboratory of Applied Chemistry, School of Environmental and Chemical Engineering, Yanshan University, Qinhuangdao 066004, P. R. China

<sup>c</sup> State Key Laboratory of Biochemical Engineering, Institute of Process Engineering, Chinese Academy of Sciences, Beijing 100190, P. R. China.

Correspondence and requests for materials should be addressed to T.J. (email: tfjiao@ysu.edu.cn) and J.Z. (email: zhoujingxin@ysu.edu.cn)

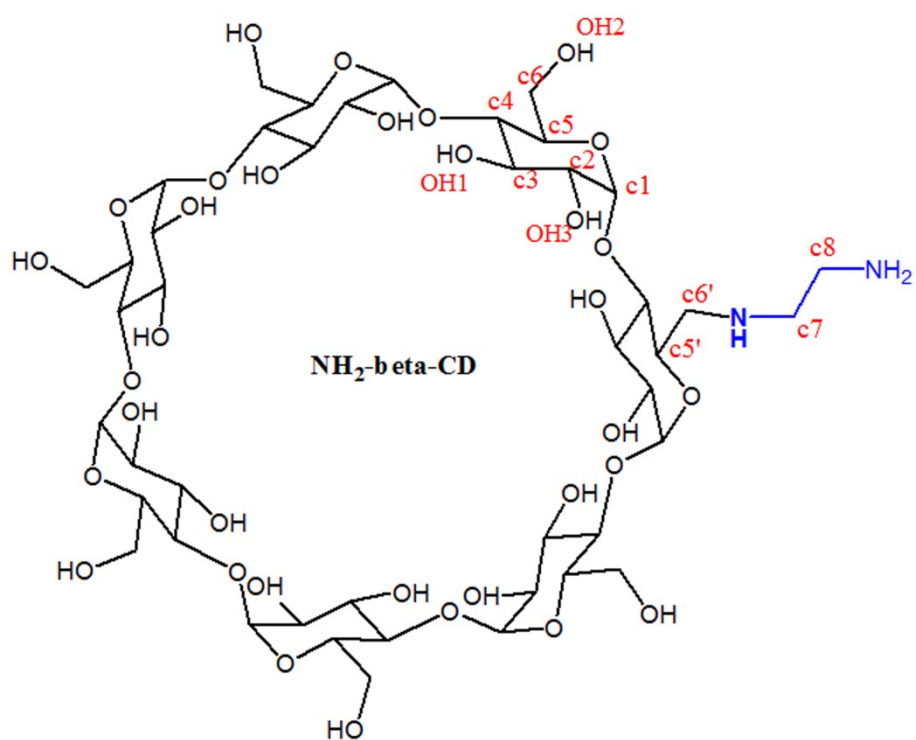

**Fig. S1.** Molecular structure of synthesized beta-cyclodextrin derivative  $\text{NH}_2\text{-beta-CD}$ .

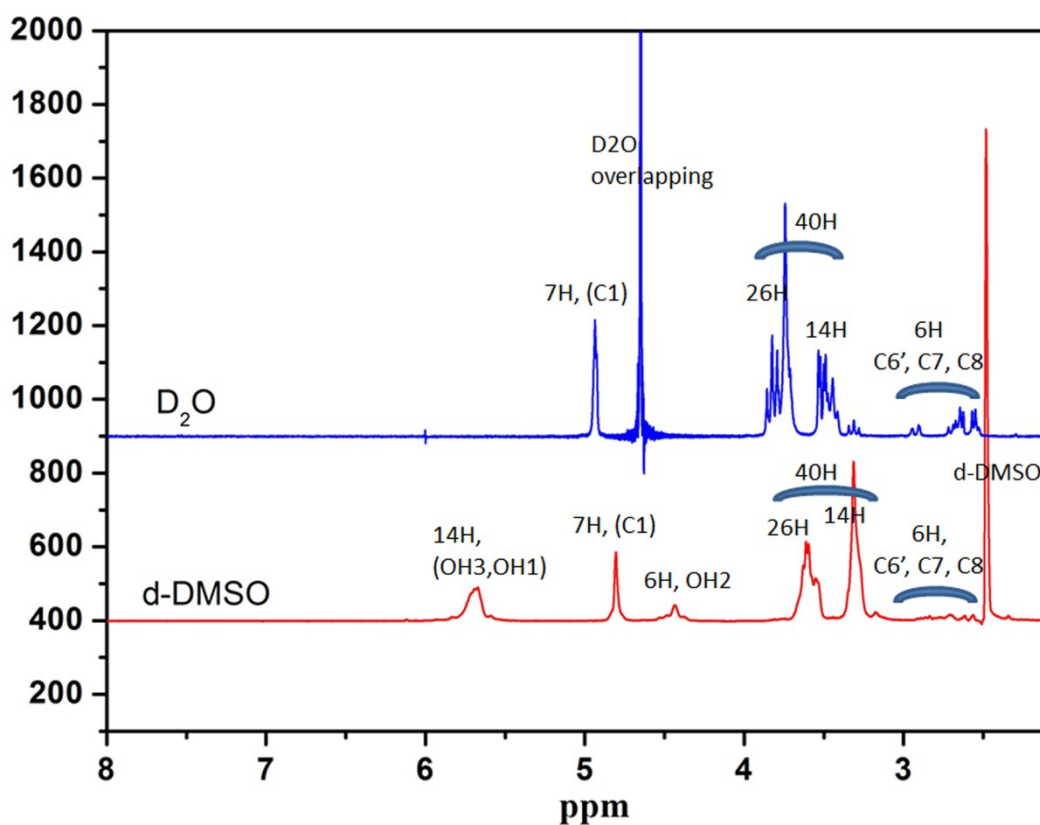

Fig. S2.  $^1\text{H}$  NMR characterization of synthesized  $\text{NH}_2$ -beta-CD in  $\text{D}_2\text{O}$  and  $d\text{-DMSO}$ .

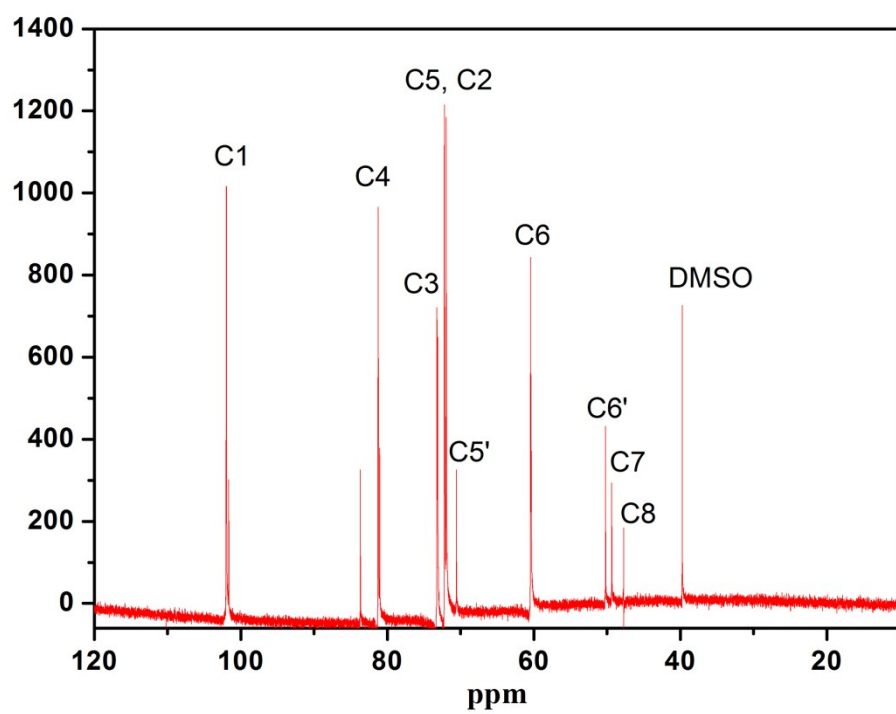

**Fig. S3.**  $^{13}\text{C}$  NMR characterization of synthesized  $\text{NH}_2$ -beta-CD in  $d$ -DMSO.

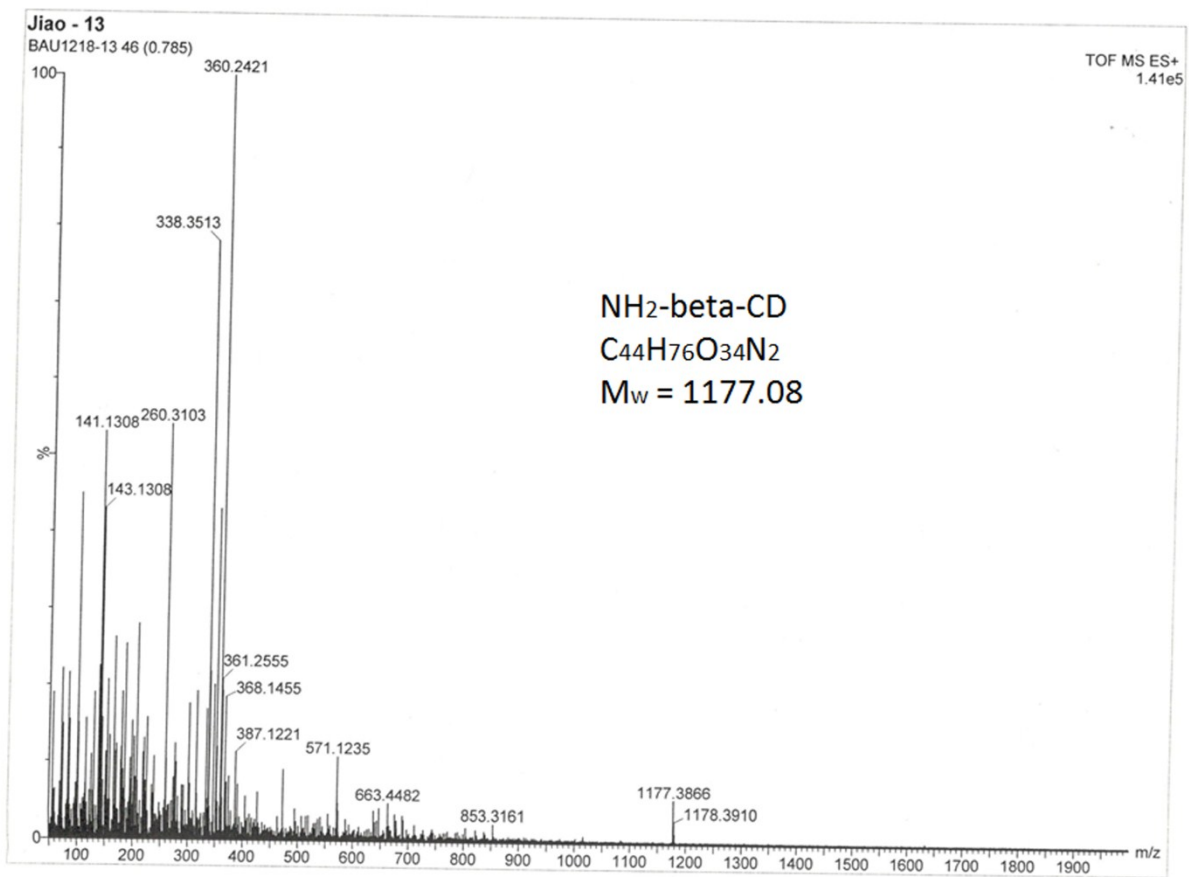

**Fig. S4.** Mass spectra characterization of synthesized NH<sub>2</sub>-beta-CD in methanol.

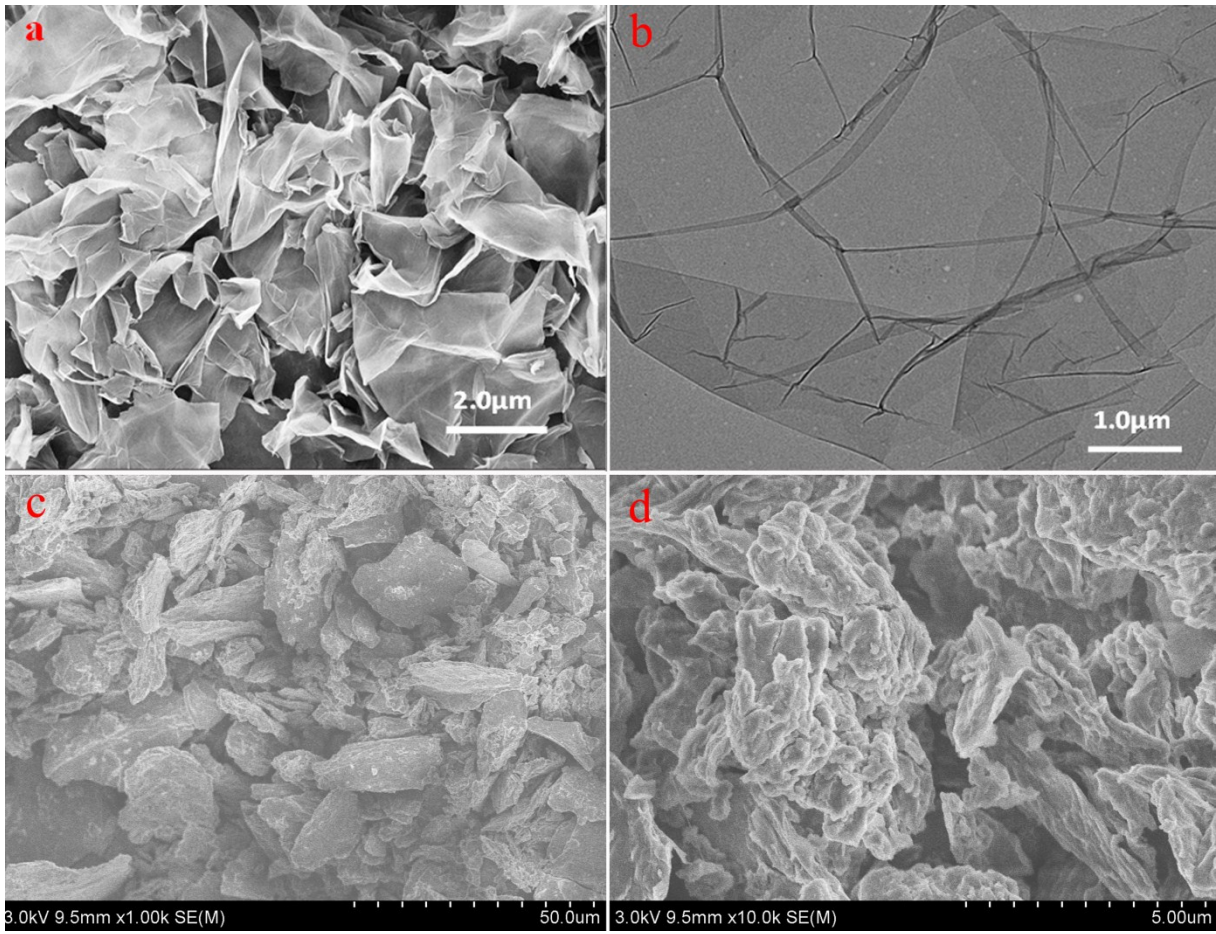

**Fig. S5.** SEM and TEM images of the as-prepared GO sample (a and b); SEM images of the obtained GO-CD material (c and d).

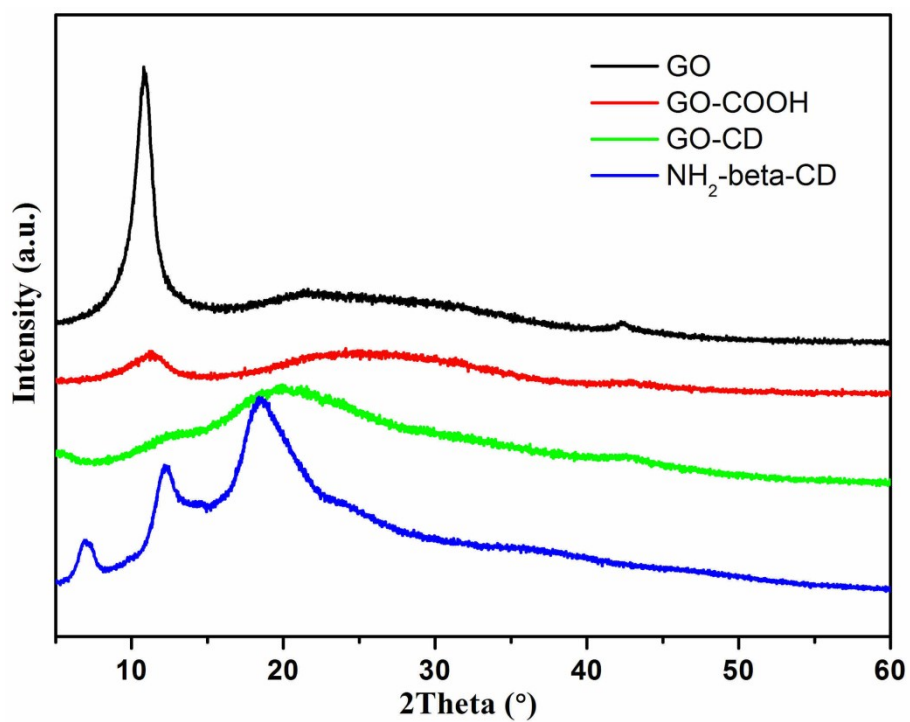

Fig. S6. XRD spectra of the as-prepared GO-CD powder and original materials

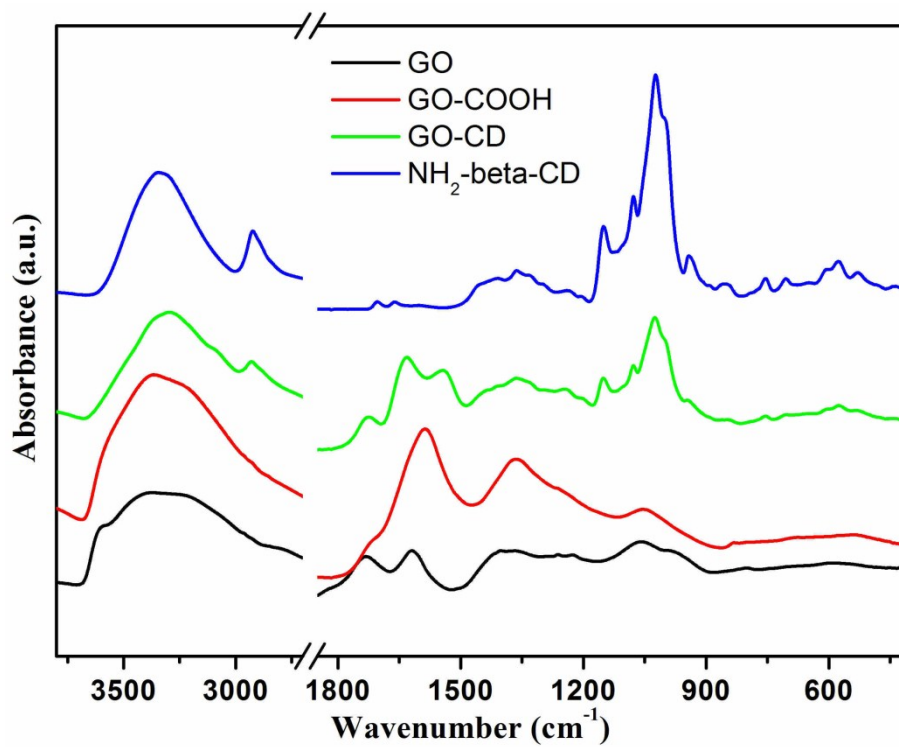

Fig. S7. FT-IR spectra of as-prepared GO-CD powder and original materials



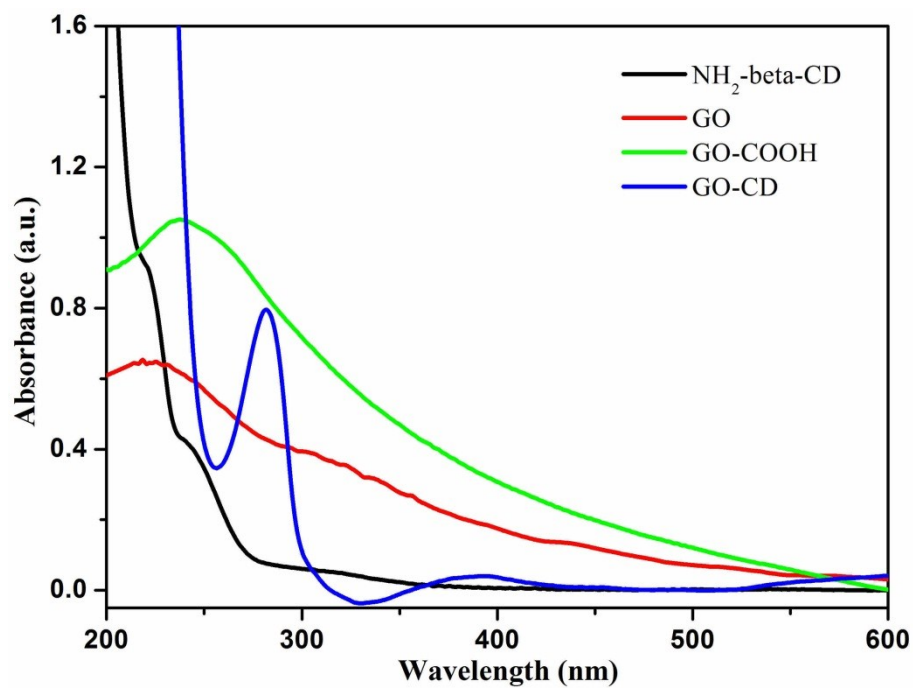

**Fig. S8.** UV-Vis spectra of aqueous solutions of GO-CD and original materials.

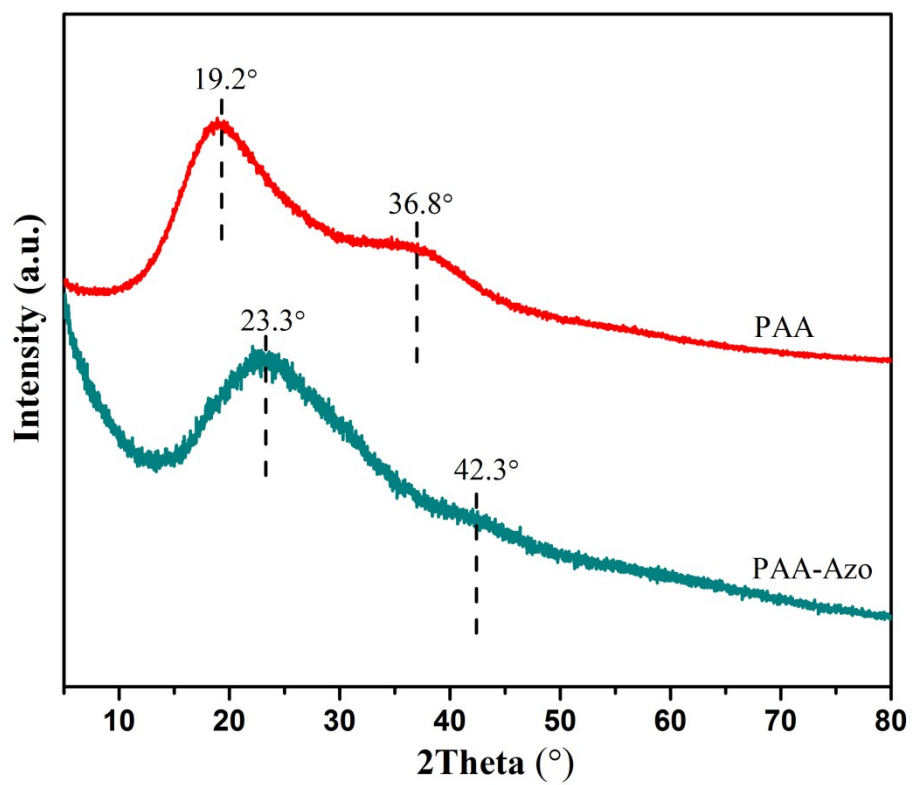

**Fig. S9.** XRD spectra of original PAA and as-synthesized PAA-Azo material.

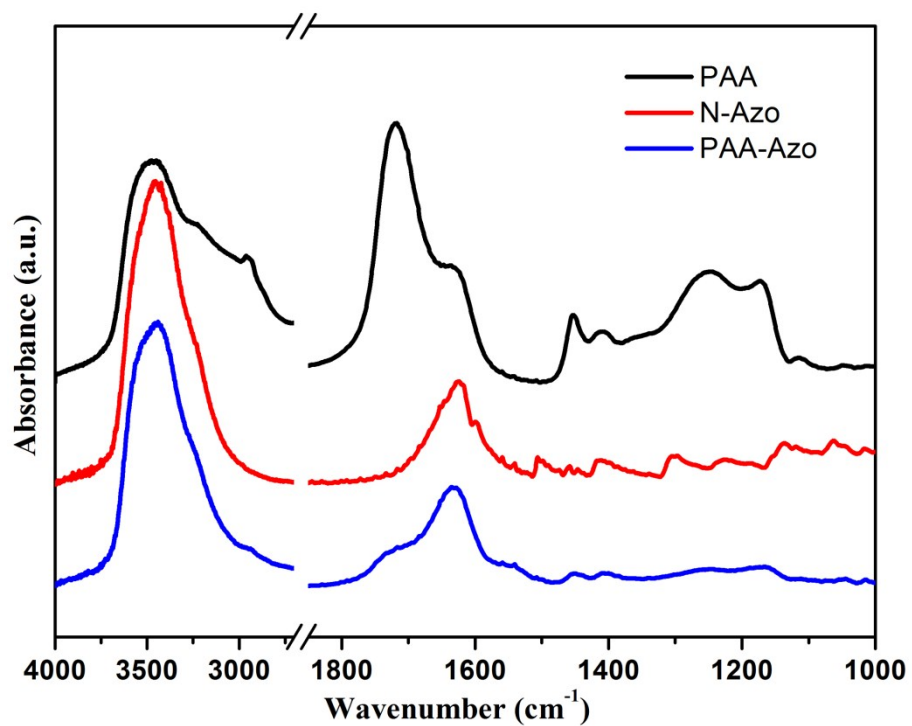

**Fig. S10.** FT-IR spectra of original PAA, N-Azo, and as-synthesized PAA-Azo material.

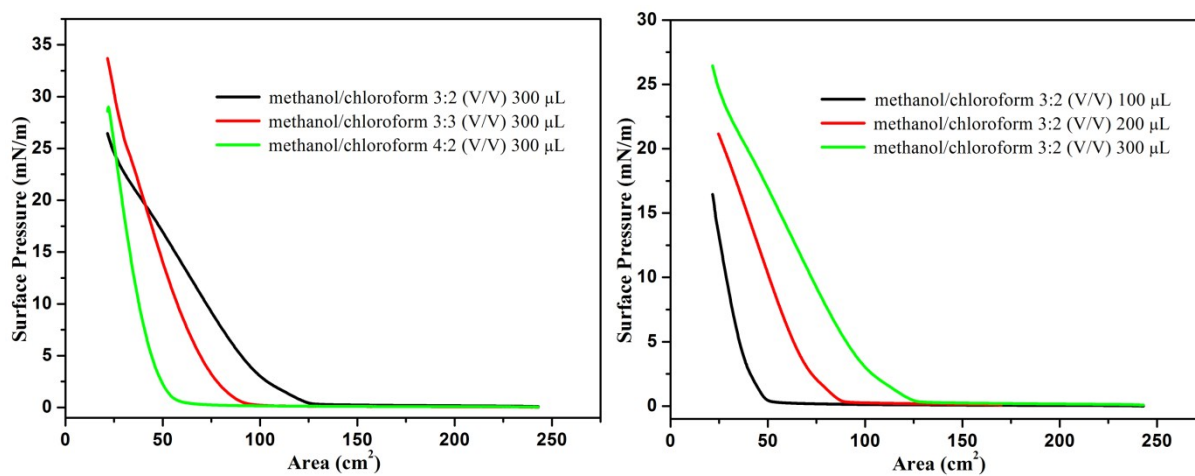

**Fig. S11.** Surface pressure-area isotherms of Langmuir films of as-prepared GO-CD solutions with different spreading solvents and volumes spread on pure water surface at room temperature.

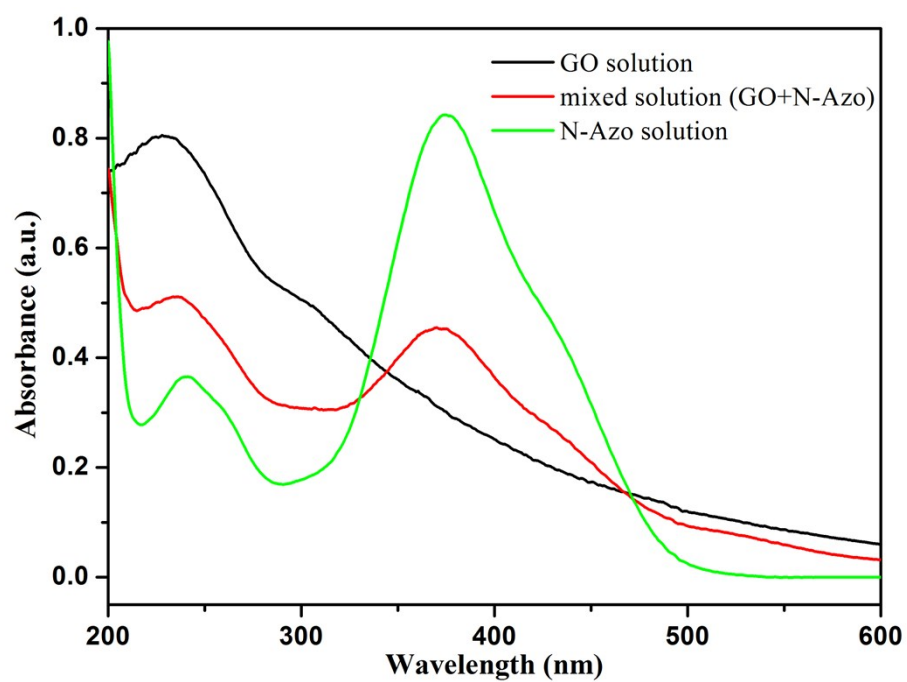

**Fig. S12.** UV-Vis spectra of aqueous mixed solution of GO and N-Azo.

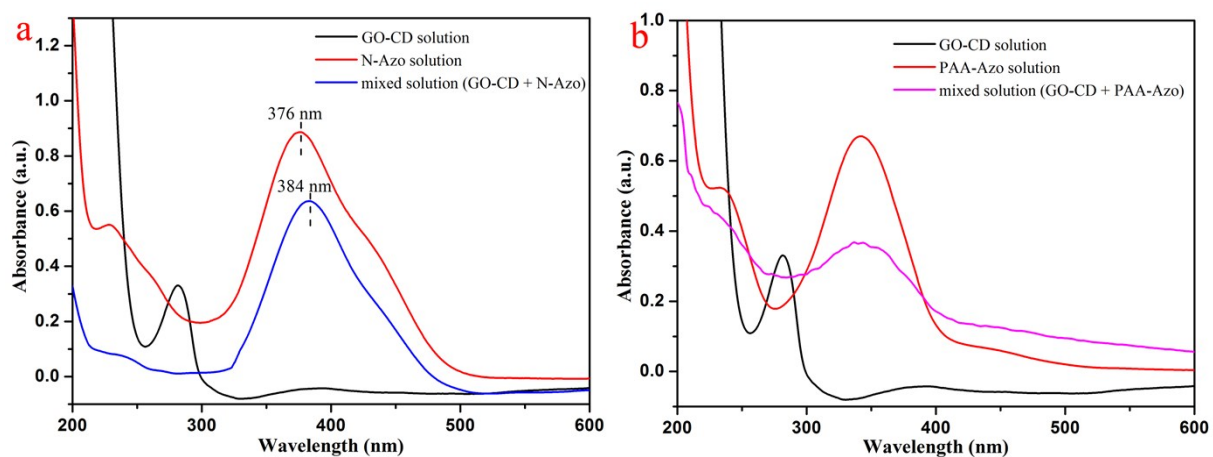

**Fig. S13.** UV-Vis spectra of mixed methanol solutions of GO-CD with N-Azo (a) or PAA-Azo (b), respectively.

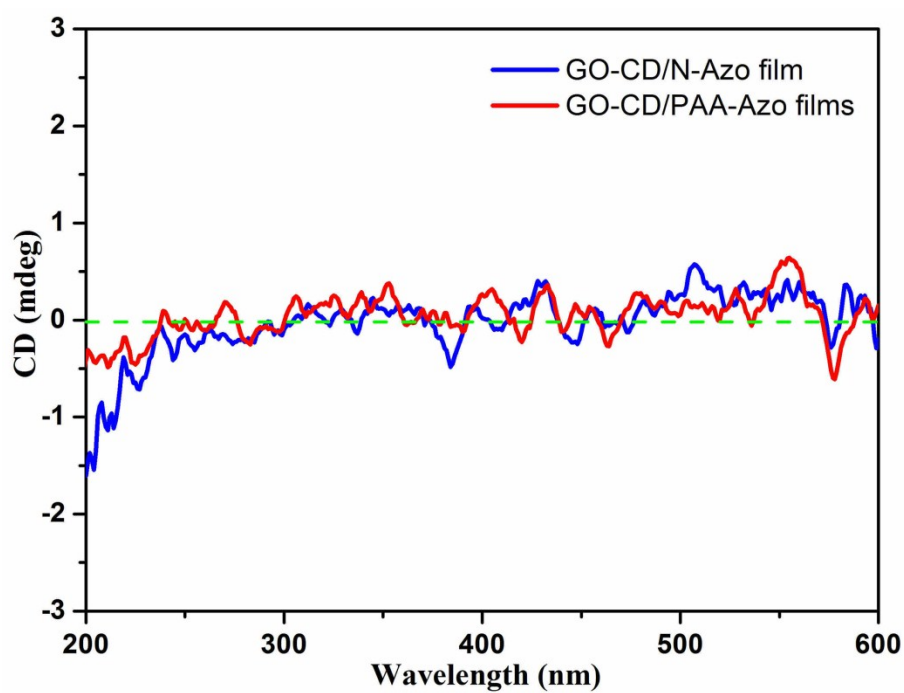

**Fig. S14.** CD spectra of the transferred multilayer GO-CD/N-Azo and GO-CD/PAA-Azo composite LB films.
